# Supplementary material
Source: MDPI journal article supplement (https://www.mdpi.com/2072-4292/14/19/5003)
Supplement: s1 [file s1]

## Supplementary Data

**Table Supplemental S1.** Dates of image capture for Sentinel 2 a+b and Planet Scope downloaded from Earth Explorer portal of the United States Geological Survey (USGS, <https://earthexplorer.usgs.gov>).

| Zimbabwe                |                      | Kenya                   |                      |
|-------------------------|----------------------|-------------------------|----------------------|
| Sentinel 2 a+ b<br>days | Planet Scope<br>days | Sentinel 2 a+ b<br>days | Planet Scope<br>days |
| 2/1/2019                | 2/1/2019             | 4/12/2019               | 4/11/2019            |
| 2/11/2019               | 2/11/2019            | 5/2/2019                | 4/16/2019            |
| 2/21/2019               | 2/24/2019            | 5/7/2019                | 5/3/2019             |
| x                       | 2/28/2019            | x                       | 5/22/2019            |
| 3/3/2019                | 3/3/2019             | x                       | 5/27/2019            |
| 3/28/2019               | 3/29/2019            | x                       | 5/31/2019            |
| 4/27/2019               | x                    | 7/1/2019                | 6/16/2019            |
| 5/17/2019               | 5/17/2019            | 7/6/2019                | 7/14/2019            |

**Table Supplemental S2.** Relevant data taken from each field that we visited, using the FAMEWS app.

| Country  | Zone          | Field | approx. data of sowing | Crop Growth Stage       | BBCH stages                                                | Farming System | Intercrop    | Level of FAW | Control      |
|----------|---------------|-------|------------------------|-------------------------|------------------------------------------------------------|----------------|--------------|--------------|--------------|
| Zimbabwe | Mashonaland E | 6     | 28 of January          | vegetative-reproductive | Principal growth stage 6: Flowering, anthesis              | Intercropping  | pumpkin      | LOW          | Ash          |
|          | Masvingo      | 8     | 10 of January          | vegetative-reproductive | Principal growth stage 6: Flowering, anthesis              | Intercropping  | pumpkin      | LOW          | Pestiside    |
|          | Masvingo      | 9     | 7 of January           | vegetative-reproductive | Principal growth stage 6: Flowering, anthesis              | Rotation       | monocrop     | HIGH         | Pestiside    |
|          | Masvingo      | 10    | 5 of January           | vegetative-reproductive | Principal growth stage 6: Flowering, anthesis              | Rotation       | monocrop     | LOW          | Pestiside    |
|          | Masvingo      | 11    | 5 of January           | vegetative-reproductive | Principal growth stage 6: Flowering, anthesis              | Rotation       | monocrop     | LOW          | Pestiside    |
|          | Masvingo      | 12    | 4 of January           | vegetative-reproductive | Principal growth stage 6: Flowering, anthesis              | Intercropping  | common beans | MEDIUM       | none         |
|          | Masvingo      | 13    | 9 of January           | vegetative-reproductive | Principal growth stage 6: Flowering, anthesis              | Rotation       | monocrop     | MEDIUM       | Pestiside    |
|          | Masvingo      | 14    | 9 of January           | vegetative-reproductive | Principal growth stage 6: Flowering, anthesis              | Rotation       | monocrop     | HIGH         | Pestiside    |
|          | Masvingo      | 15    | 9 of January           | vegetative-reproductive | Principal growth stage 6: Flowering, anthesis              | Rotation       | monocrop     | MEDIUM       | Pestiside    |
| Tanzania | Arusha        | 1     | middle April           | vegetative-reproductive | Principal growth stage 6: Flowering, anthesis              | Seasonal       | monocrop     | HIGH         | hand picking |
|          | Arusha        | 2     | middle April           | vegetative              | Principal growth stage 5: Inflorescence emergence, heading | Seasonal       | monocrop     | MEDIUM       | not know     |
|          | Arusha        | 3     | middle April           | vegetative              | Principal growth stage 5: Inflorescence emergence, heading | Seasonal       | monocrop     | LOW          | not know     |

|       |        |    |              |                         |                                                               |               |                 |        |           |
|-------|--------|----|--------------|-------------------------|---------------------------------------------------------------|---------------|-----------------|--------|-----------|
| Kenya | Arusha | 4  | middle April | vegetative              | Principal growth stage 5:<br>Inflorescence emergence, heading | Seasonal      | monocrop        | MEDIUM | not know  |
|       | Arusha | 5  | early April  | vegetative-reproductive | Principal growth stage 6: Flowering,<br>anthesis              | Intercropping | common<br>beans | LOW    | not know  |
|       | Arusha | 6  | early April  | vegetative-reproductive | Principal growth stage 6: Flowering,<br>anthesis              | Intercropping | common<br>beans | LOW    | not know  |
|       | Arusha | 7  | early April  | vegetative-reproductive | Principal growth stage 6: Flowering,<br>anthesis              | Intercropping | sunflower       | LOW    | not know  |
|       | Arusha | 8  | early may    | vegetative              | Principal growth stage 5:<br>Inflorescence emergence, heading | Intercropping | common<br>beans | HIGH   | not know  |
|       | Arusha | 9  | late April   | vegetative              | Principal growth stage 5:<br>Inflorescence emergence, heading | Intercropping | common<br>beans | LOW    | Pestiside |
|       | Arusha | 10 | early April  | vegetative-reproductive | Principal growth stage 6: Flowering,<br>anthesis              | Intercropping | common<br>beans | LOW    | not know  |
|       | Arusha | 11 | middle April | vegetative              | Principal growth stage 5:<br>Inflorescence emergence, heading | Seasonal      | monocrop        | LOW    | not know  |
|       | Arusha | 12 | middle April | vegetative-reproductive | Principal growth stage 6: Flowering,<br>anthesis              | Intercropping | sunflowers      | LOW    | not know  |
|       | Busia  | 1  | middle April | vegetative              | Principal growth stage 5:<br>Inflorescence emergence, heading | Intercropping | common<br>beans | MEDIUM | Ash       |
|       | Busia  | 2  | late April   | vegetative              | Principal growth stage 5:<br>Inflorescence emergence, heading | Intercropping | common<br>beans | LOW    | Ash       |
|       | Busia  | 3  | middle April | vegetative              | Principal growth stage 5:<br>Inflorescence emergence, heading | Intercropping | common<br>beans | LOW    | none      |
|       | Busia  | 4  | middle April | vegetative              | Principal growth stage 5:<br>Inflorescence emergence, heading | Intercropping | common<br>beans | LOW    | Ash       |
|       | Busia  | 5  | middle April | vegetative              | Principal growth stage 5:<br>Inflorescence emergence, heading | Intercropping | ground<br>nuts  | LOW    | Ash       |

|       |   |              |                             |                                                               |               |                 |        |           |
|-------|---|--------------|-----------------------------|---------------------------------------------------------------|---------------|-----------------|--------|-----------|
| Busia | 6 | middle April | vegetative                  | Principal growth stage 5:<br>Inflorescence emergence, heading | Intercropping | common<br>beans | MEDIUM | none      |
| Busia | 1 | late April   | vegetative                  | Principal growth stage 5:<br>Inflorescence emergence, heading | Intercropping | ground<br>nuts  | LOW    | none      |
| Busia | 2 | early May    | vegetative                  | Principal growth stage 5:<br>Inflorescence emergence, heading | Intercropping | common<br>beans | HIGH   | none      |
| Busia | 4 | middle April | vegetative                  | Principal growth stage 5:<br>Inflorescence emergence, heading | Intercropping | common<br>beans | LOW    | none      |
| Busia | 5 | early April  | vegetative-<br>reproductive | Principal growth stage 6: Flowering,<br>anthesis              | Intercropping | ground<br>nuts  | MEDIUM | none      |
| Busia | 1 | late April   | vegetative                  | Principal growth stage 5:<br>Inflorescence emergence, heading | Seasonal      | monocrop        | HIGH   | Ash       |
| Busia | 2 | late April   | vegetative                  | Principal growth stage 5:<br>Inflorescence emergence, heading | Seasonal      | monocrop        | HIGH   | Ash       |
| Busia | 5 | late April   | vegetative                  | Principal growth stage 5:<br>Inflorescence emergence, heading | Seasonal      | monocrop        | HIGH   | none      |
| Busia | 6 | early May    | vegetative                  | Principal growth stage 5:<br>Inflorescence emergence, heading | Seasonal      | monocrop        | HIGH   | none      |
| Busia | 1 | late April   | vegetative                  | Principal growth stage 5:<br>Inflorescence emergence, heading | Intercropping | common<br>beans | MEDIUM | Pestiside |
| Busia | 3 | late March   | vegetative-<br>reproductive | Principal growth stage 6: Flowering,<br>anthesis              | Seasonal      | monocrop        | LOW    | none      |
| Busia | 4 | late March   | vegetative-<br>reproductive | Principal growth stage 6: Flowering,<br>anthesis              | Seasonal      | monocrop        | MEDIUM | none      |
| Busia | 5 | early April  | vegetative                  | Principal growth stage 5:<br>Inflorescence emergence, heading | Seasonal      | monocrop        | MEDIUM | none      |
| Busia | 8 | late April   | vegetative                  | Principal growth stage 5:<br>Inflorescence emergence, heading | Seasonal      | monocrop        | HIGH   | none      |



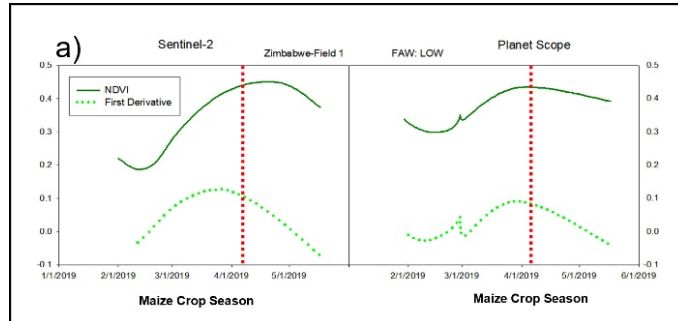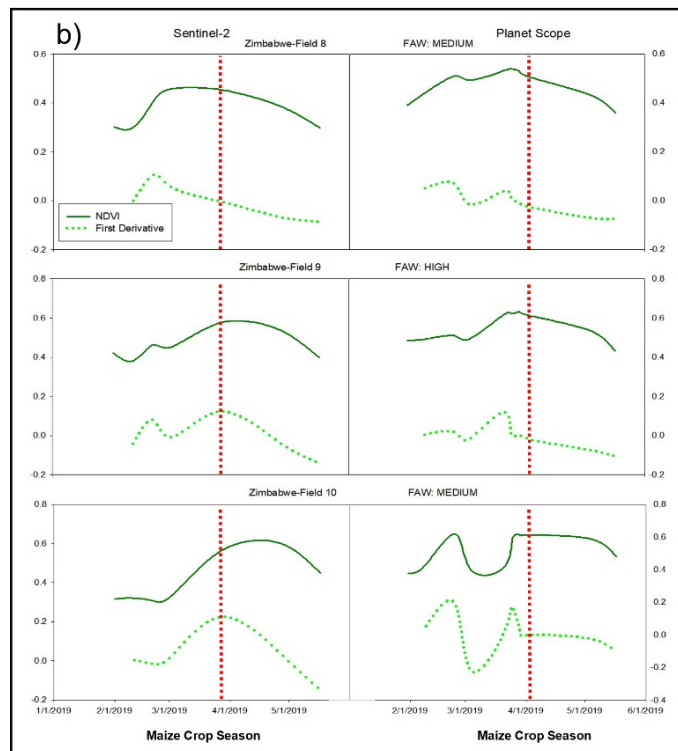

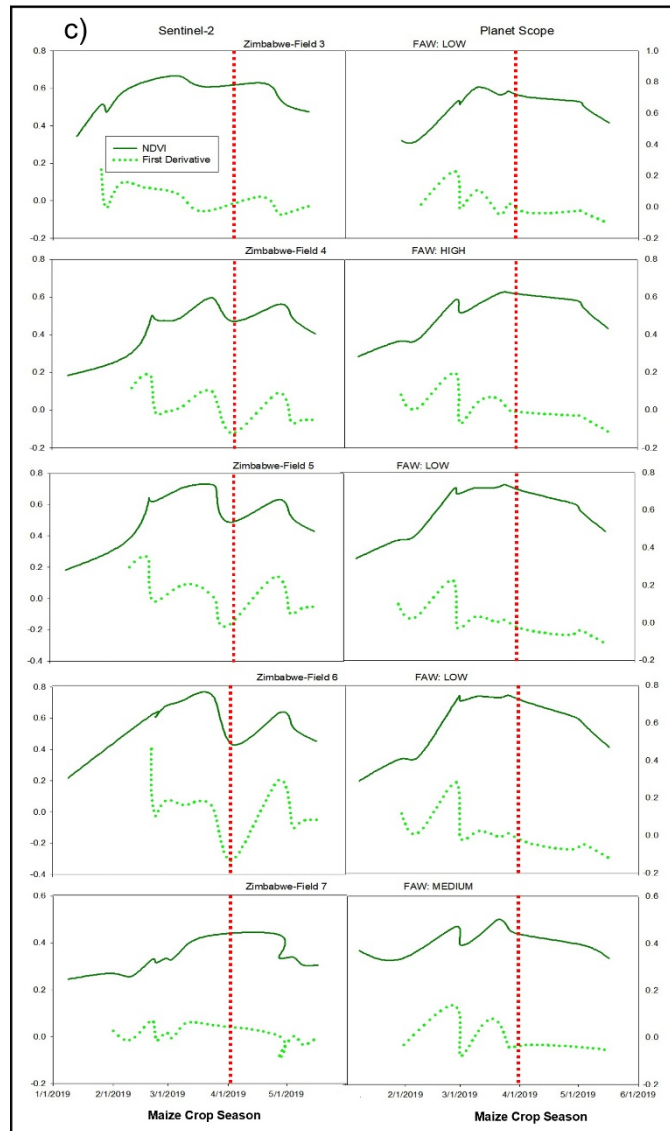

**Figure S1. (a, b & c)** NDVI curves of vegetation from Zimbabwe (continue green line) and the first derivative of the NDVI curves (dashed light green line) were taken from Sentinel 2 a+b (left) and Planet Scope (right) along the first season of maize from January until end march/ April. The field presented three levels of infestations: LOW, MEDIUM, and HIGH. The red line is the day that we were in the field taking the data from 30 of March to 5 of April of 2019. X-axis (left) values between 0-0.8 belong to the NDVI index and X-axis (right) values between -0.2-0.8 belong to NDVI first derivative. Y-axis belongs to the maize crop season from the sowing day to harvest day.

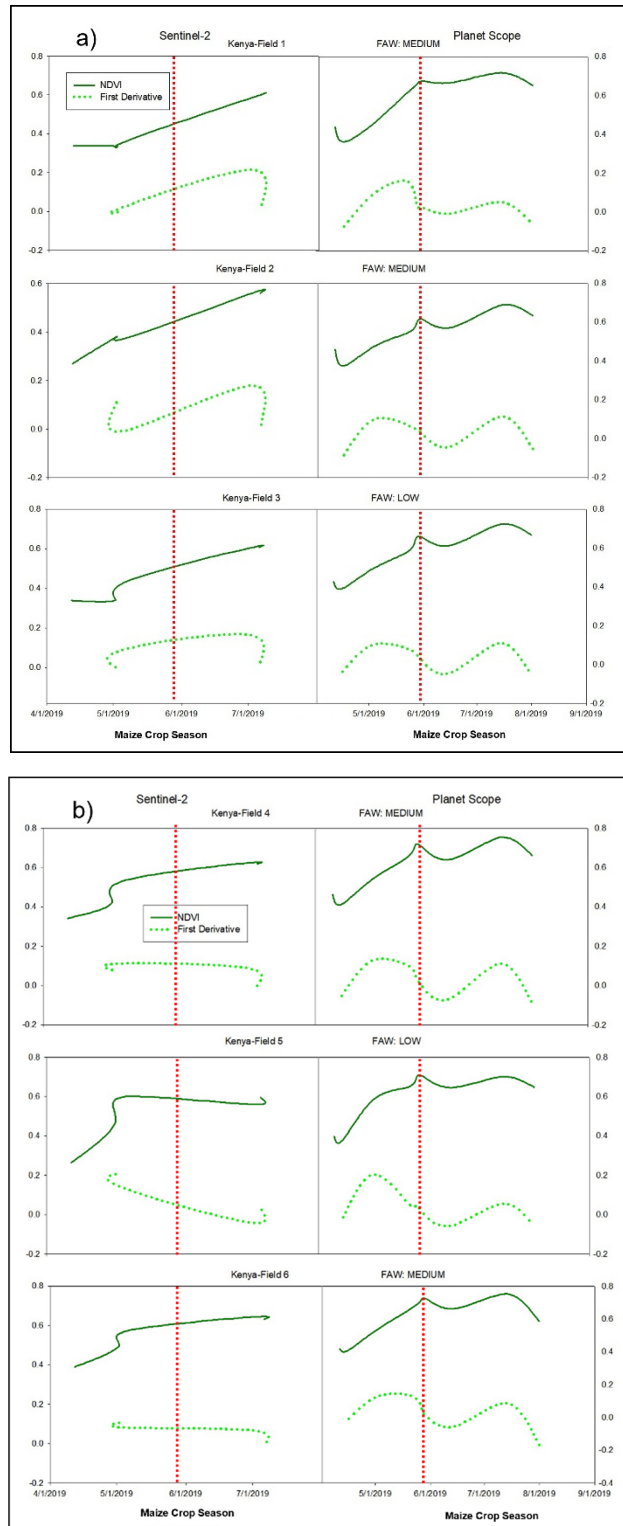

**Figure S2. (a & b)** NDVI curves of vegetation from Kenya (continue green line) and the first derivative of the NDVI curves (dashed light green line) were taken from Sentinel 2 a+b (left) and Planet Scope (right) along the first season of maize from the end of April until end of July. The field presented three levels of infestations: LOW, MEDIUM, and HIGH. The red line is the day that we were in the field taking the data on the 27 of May of 2019. X-axis (left) values between 0-0.8 belong to the NDVI index and X-axis (right) values between -0.2-0.8 belong to NDVI first derivative. Y-axis belongs to the maize crop season from the sowing day to harvest day.



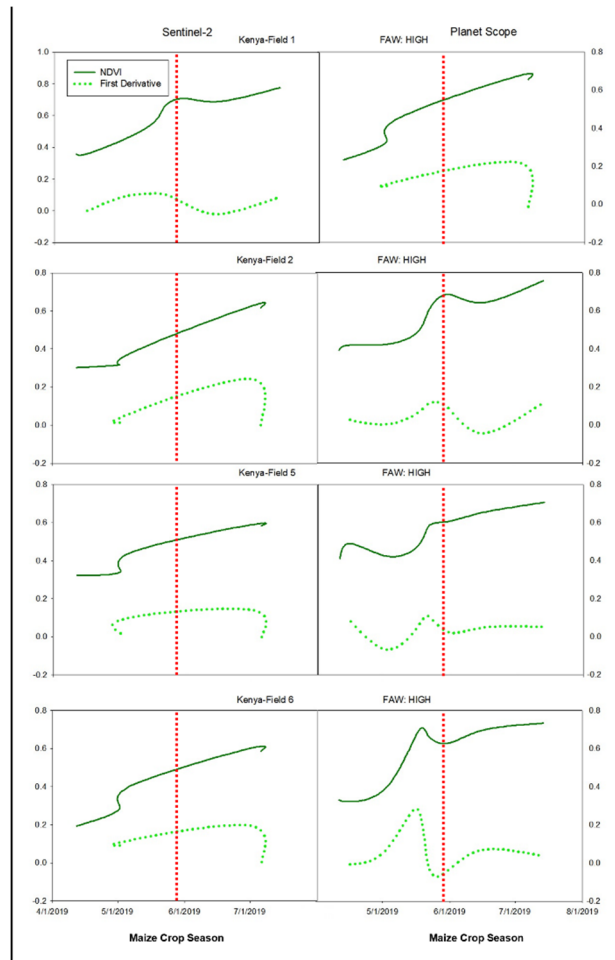

**Figure S3.** NDVI curves of vegetation from Kenya (continue green line) and the first derivative of the NDVI curves (dashed light green line) were taken from Sentinel 2 a+b (left) and Planet Scope (right) along the first season of maize from the end of April until end of July. The field presented three levels of infestations: LOW, MEDIUM, and HIGH. The red line is the day that we were in the field taking the data on the 29 of May of 2019. X-axis (left) values between 0-0.8 belong to the NDVI index and X-axis (right) values between -0.2-0.8 belong to NDVI first derivative. Y-axis belongs to the maize crop season from the sowing day to harvest day.

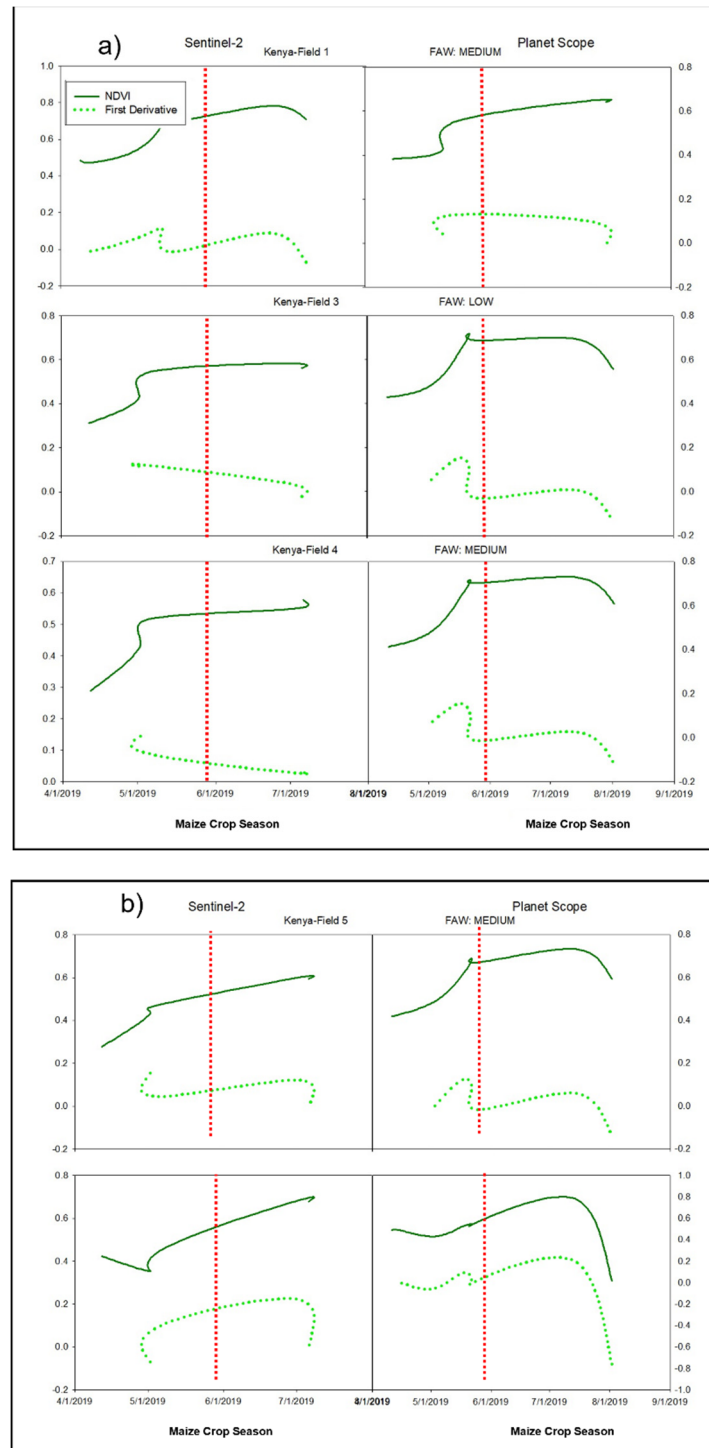

**Figure S4.** NDVI curves of vegetation from Kenya (continue green line) and the first derivative of the NDVI curves (dashed light green line) were taken from Sentinel 2 a+b (left) and Planet Scope (right) along the first season of maize from the end of April until end of July. The field presented three levels of infestations: LOW, MEDIUM, and HIGH. The red line is the day that we were in the field taking the data on the 30 of May of 2019. X-axis (left) values between 0-0.8 belong to the NDVI index and X-axis (right) values between -0.2-0.8 belong to NDVI first derivative. Y-axis belongs to the maize crop season from the sowing day to harvest day.
